# Supplementary material for: Environmental Assessment of Recycling (EAoR) for Safe Recycling of Steelmaking Slag in the Republic of Korea: Applications, Leaching Test, and Toxicity
Source: MDPI journal article supplement (doi:10.3390/su13168805), 2021-08-06
Supplement: s1 [file s1]

**Supporting Information Of Environmental assessment of recycling (EAoR) for safe recycling of steelmaking slag in the Republic of Korea: Applications, leaching test, toxicity**

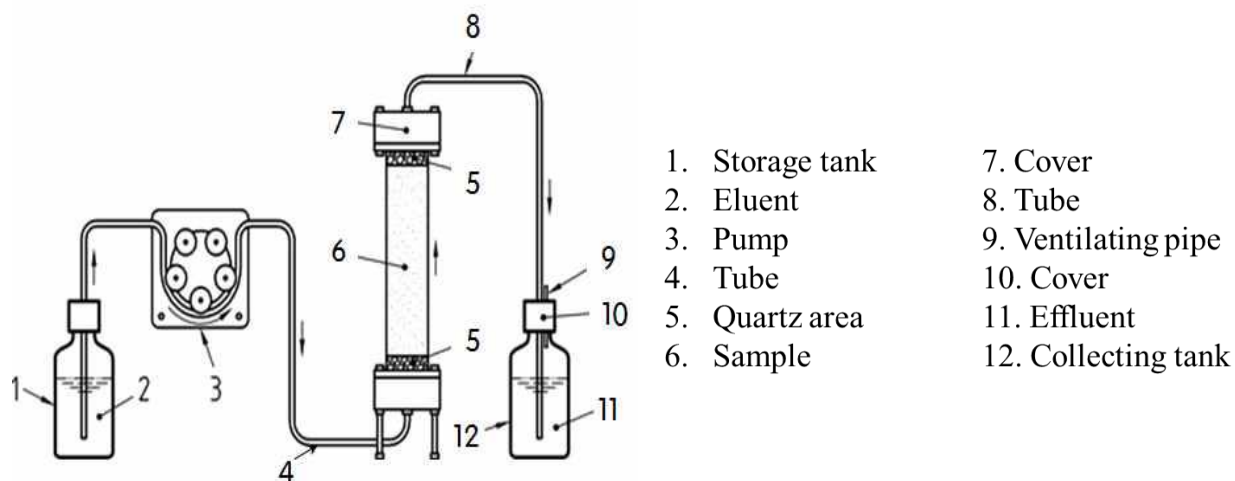

Figure S1. Schematic of percolation test

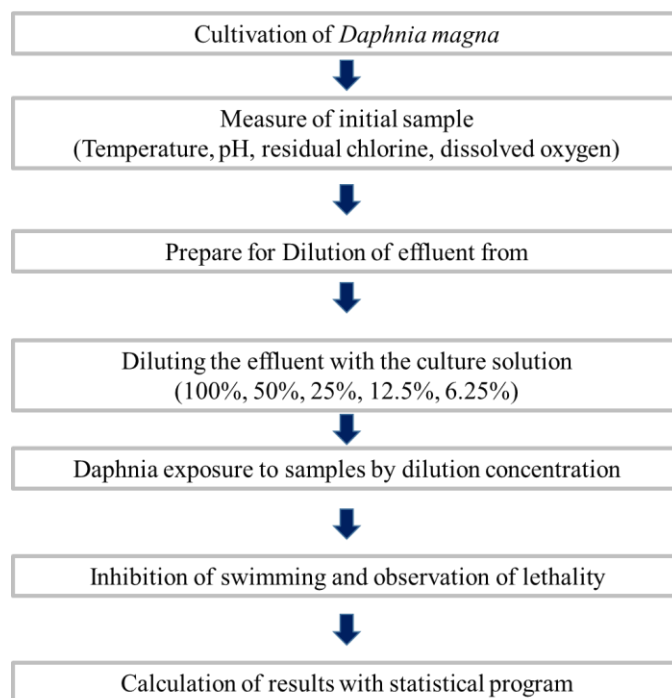

Figure S2. Procedure of toxicity test

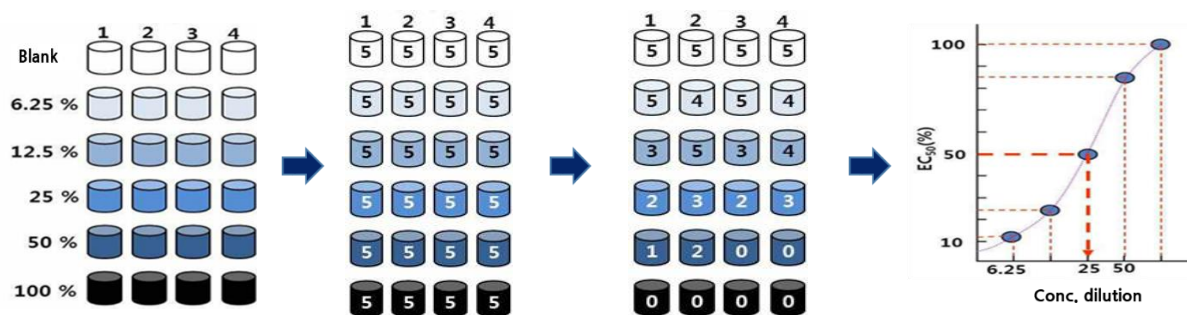

1. Sample preparation by dilution concentration

2. Add daphnia into each beaker

3. Count Anti-swimming daphnia

4. Calculation of average impact ratio

Figure S3. Schematic of estimation toxicity using with *Daphnia magna*

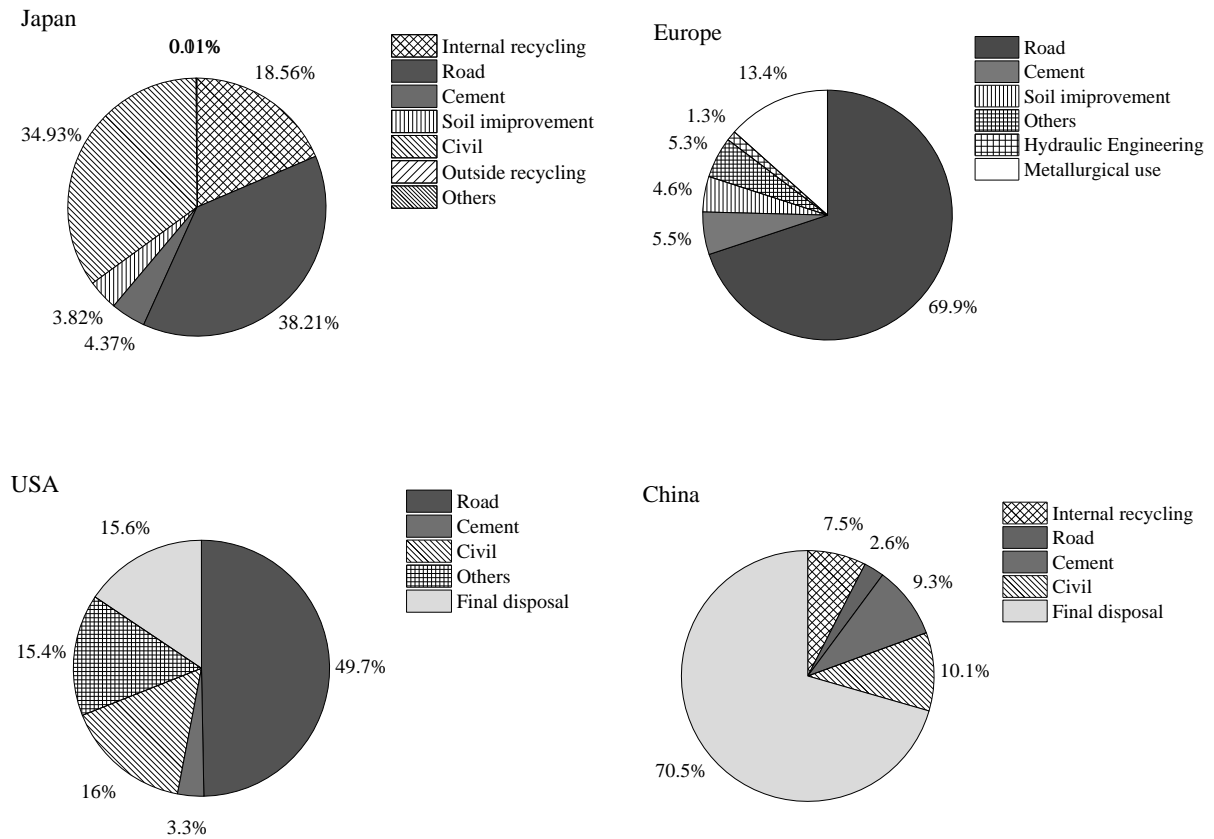

Figure S4. Steel slag utilization in Japan, Europe, the United States, and China

Table S1. Standard guidelines for recycling of slag in different countries

| Country           | Standard                                                                                                         | Range                                                                                                        | Method                                  | pH       | Standard of leaching test                                                               | Other standards                                                                                                                                                                                                                                                                                                      |
|-------------------|------------------------------------------------------------------------------------------------------------------|--------------------------------------------------------------------------------------------------------------|-----------------------------------------|----------|-----------------------------------------------------------------------------------------|----------------------------------------------------------------------------------------------------------------------------------------------------------------------------------------------------------------------------------------------------------------------------------------------------------------------|
| Republic of Korea | - Hazardous waste<br>- Standard relating to soil environmental pollution                                         | Can be used within the standard for hazardous waste                                                          | Leaching test (mg/L)                    | -        | Hg 0.005<br>Cd 0.3<br>Pb 3<br>Cr <sup>6+</sup> 1.5<br>As 1.5<br>Cu 3<br>CN 1            | Standards for soil environmental pollution<br>("1"/"2" area mg/kg)<br>Cu 50/200<br>Cd 1.5/12<br>Pb 100/400<br>As 6/20<br>Hg 4/16<br>Cr <sup>6+</sup> 4/12<br>Ni 40/160<br>Zn 300/800<br>CN 2/120<br>Organophosphorus compound 10/30<br>Phenol 4/20<br>TCE 8/40<br>PCE 4/24<br>PCB - /12<br>BTEX -/80<br>TPH 500/2000 |
| Japan             | - Objective standard related to slag<br>- Objective standard related to molten solidification of general waste   | Recycling is possible if the environmental standards related to soil pollution are satisfied                 | Leaching test (mg/L)                    | -        | T-Hg 0.0005<br>Cd 0.01<br>Pb 0.01<br>Cr <sup>6+</sup> 0.05<br>As 0.01<br>Se 0.01        | Guidelines for promotion of the use of melted slag in Chiba Prefecture<br>Same as the dissolution test criteria, and even if the slag criteria are not satisfied, it can be recycled if the recycled product criteria are satisfied                                                                                  |
| Germany           | - DIN 38414<br>- Standard for recycling construction materials such as mineral by-products                       | Standard for waste raw materials of recycling products                                                       | Leaching test (mg/L)                    | 5~12     | Cr 0.02<br>Ni 0.02                                                                      |                                                                                                                                                                                                                                                                                                                      |
| Netherlands       | - Availability Test, Columntest, and Serial Batch Extraction in NVN 2508<br>- Monolith Tank Leaching in NVN 5432 | Controlled by the amount of mixing per 100 years in the soil and surface water around construction materials | Tank leaching test (mg/m <sup>3</sup> ) | 5<pH<7.5 | Hg 4.5<br>Cd 12<br>Pb 1275<br>Cr 1500<br>As 435<br>Se 15<br>Cu 540<br>Zn 2100<br>Ni 525 |                                                                                                                                                                                                                                                                                                                      |

|  |  |  |  |  |                                                                                                                                   |  |
|--|--|--|--|--|-----------------------------------------------------------------------------------------------------------------------------------|--|
|  |  |  |  |  | Ba 6300<br>Sn 300<br>Sb 39<br>Co 300<br>Mo 150<br>V 2400<br>Cl 30000<br>SO <sub>4</sub> 45000<br>Br 300<br>F 14000<br>CN(free) 15 |  |
|--|--|--|--|--|-----------------------------------------------------------------------------------------------------------------------------------|--|

Table S2. Comparison of leaching methods in different countries

| Country           | Method name                                         | Particle size | Solvent                            | pH         | Volume of sample (g) | Sample/ Solvent (g/mL) | Stir type                    | Time (hrs)                                         | Filter (μm) |
|-------------------|-----------------------------------------------------|---------------|------------------------------------|------------|----------------------|------------------------|------------------------------|----------------------------------------------------|-------------|
| Republic of Korea | Waste process test                                  | 0.5~5         | Distilled water                    | 5.8~6.3    | 100                  | 10                     | Shake                        | 6                                                  | 1           |
|                   | Soil pollution process test                         | 2             | 0.1N/1N HCl                        | -          | 10                   | 5                      | Shake                        | 1/0.5                                              | 4           |
|                   |                                                     | 0.15          | Aqua regia                         | -          | 3                    | 33                     | Shake                        | 2 hrs at room temp. and elevate temp, respectively | 8           |
| Japan             | MOE Japan article 13 (leaching of waste)            | 0.5~5         | Distilled water+ HCl               | 5.8~6.3    | >50                  | 10                     | Shake                        | 6                                                  | 1           |
|                   | MOE Japan article 19 (Standard of soil environment) | <2            | Distilled water+ HCl               | 5.8~6.3    | >50                  | 10                     | Shake                        | 6                                                  | 0.45        |
| Germany           | DIN38413S4                                          | <10           | Deionized water                    | -          | 100                  | 10                     | Up and down motion of shaker | 6/24                                               | 0.45        |
| Netherlands       | Serial Batch                                        | <3            | Deionized water                    | 4          | 40                   | 20                     | Shake                        | 24 × 5 step                                        | 0.45        |
|                   | Column test                                         | <3            | Deionized water                    | 4          | -                    | 0.1~10                 | Upflow                       | -                                                  | 0.45        |
|                   | Availability Test                                   | <125 μm       | Deionized water+HNO <sub>3</sub>   | 7.4 (keep) | 16                   | 100                    | Shake                        | 3 × 2 step                                         | 0.45        |
| France            | AFNOR x 31-210                                      | <4            | Deionized water                    | -          | 150                  | 10                     | Shake 60 rpm                 | 16                                                 | 0.45        |
| Switzerland       | TVA (Technische Verordnung Abfaelle)                | -             | saturated CO <sub>2</sub> solution | 5.6        | 100~200              | 10                     | CO <sub>2</sub> 100 mL/min   | 24                                                 | 0.45        |

|        |      |      |                                                  |           |     |    |                   |    |         |
|--------|------|------|--------------------------------------------------|-----------|-----|----|-------------------|----|---------|
| USA    | TCLP | <9.5 | Acetic acid or<br>acetic acid buffer<br>solution | 2.88/4.93 | 100 | 20 | Shake 30±2<br>rpm | 18 | 0.6~0.8 |
| Canada | TCLP | <9.5 | Acetic acid or<br>acetic acid buffer<br>solution | 2.88/4.93 | 100 | 20 | Shake 30±2<br>rpm | 18 | 0.6~0.8 |
