# Supplementary material for: Environmental Assessment of Recycling (EAoR) for Safe Recycling of Steelmaking Slag in the Republic of Korea: Applications, Leaching Test, and Toxicity
Source: MDPI journal article supplement (doi:10.3390/su13168805), 2021-08-06
Supplement: s1 [file s1]

Archive with 1 entries (1 files):
- sustainability-1308696-supplementary.pdf
